# Supplementary material for: Prestige and dominance-based hierarchies exist in naturally occurring human groups, but are unrelated to task-specific knowledge
Source: R Soc Open Sci. 2019 May 1;6(5):181621. doi: 10.1098/rsos.181621 (PMC6549959; doi:10.1098/rsos.181621)
Supplement: Supplementary research materials [file rsos181621supp1.docx]

**SUPPLEMENTARY MATERIAL**

1. Wider-community questionnaires: pp.2-3
2. Quiz: pp.4-14
3. Within-group questionnaires: p.15
4. List of participating groups: p.16
5. List of named influential community members: p.17-20
6. List of named community learning models and learning topic p.21-24

**YOUR ID NUMBER:________ YOUR GENDER: ______ YOUR YEAR OF BIRTH: _______**

Please name someone who you think of as having **high status, or as being highly influential**, in either your **local community** or in **your country**. By “highly influential” we mean: is paid attention to, leads decisions. E.g. The Prime Minister, an M.P., Councilor, Mayor, or local celebrity:

Name: ___________________________ Their role/position/job: _________________________

Please rate this person according to the following scale:

**1------------2------------3------------4------------5------------6------------7**

**Very Much/ TRUE**

**Not At All/ NOT TRUE**

**Somewhat**

1. Members of your community respect and admire them _____
2. Members of your community do NOT want to be like them_____
3. They enjoy having control over other members of the community_____
4. Members of your community always expect them to be successful_____
5. They often try to get their own way regardless of what others in the community may want_____
6. Members of your community do NOT value their opinion_____
7. They are willing to use aggressive tactics to get their way_____
8. They are held in high esteem by members of the community_____
9. They try to control others rather than permit others to control them_____
10. They do NOT have a forceful or dominant personality_____
11. Members of the community know it is better to let them have their way_____
12. They do NOT enjoy having authority over other members of the community_____
13. Their unique talents and abilities are recognized by others in the community_____
14. They are considered an expert on some matters by members of the community_____
15. Members of your community seek their advice on a variety of matters_____
16. Members of your community are afraid of them_____
17. Others do NOT want to spend time with them_____

**YOUR ID NUMBER**: __________

Please name someone either from your country or your local community that you would like to **learn from** or **learn to be like**. E.g. learn a skill of theirs, or gain knowledge/advice from:

Name: ___________________________ What of theirs would you like to learn:_________________________

Please rate this person according to the following scale:

**1------------2------------3------------4------------5------------6------------7**

**Very Much/ TRUE**

**Not At All/ NOT TRUE**

**Somewhat**

1. Members of your community respect and admire them _____
2. Members of your community do NOT want to be like them_____
3. They enjoy having control over other members of the community_____
4. Members of your community always expect them to be successful_____
5. They often try to get their own way regardless of what others in the community may want_____
6. Members of your community do NOT value their opinion_____
7. They are willing to use aggressive tactics to get their way_____
8. They are held in high esteem by members of the community_____
9. They try to control others rather than permit others to control them_____
10. They do NOT have a forceful or dominant personality_____
11. Members of the community know it is better to let them have their way_____
12. They do NOT enjoy having authority over other members of the community_____
13. Their unique talents and abilities are recognized by others in the community_____
14. They are considered an expert on some matters by members of the community_____
15. Members of your community seek their advice on a variety of matters_____
16. Members of your community are afraid of them_____
17. Others do NOT want to spend time with them_____

**ART QUIZ**

1. **Henri Matisse was a French artist of the:**
   1. **15th Century**
   2. **20th Century**
2. **The singing butler is a famous modern painting by the Scottish painter:**
   1. **Jack Vettriano**
   2. **Andrew Geddes**
3. **The starry night is a famous painting by:**
   1. **Vincent van Gogh**
   2. **Jackson Pollock**
4. **The Birth of Venus**
   1. **Sandro Botticelli**
   2. **Leonardo da Vinci**
5. **Rembrandt was famous for which style of painting?**
   1. **Baroque**
   2. **Surrealism**


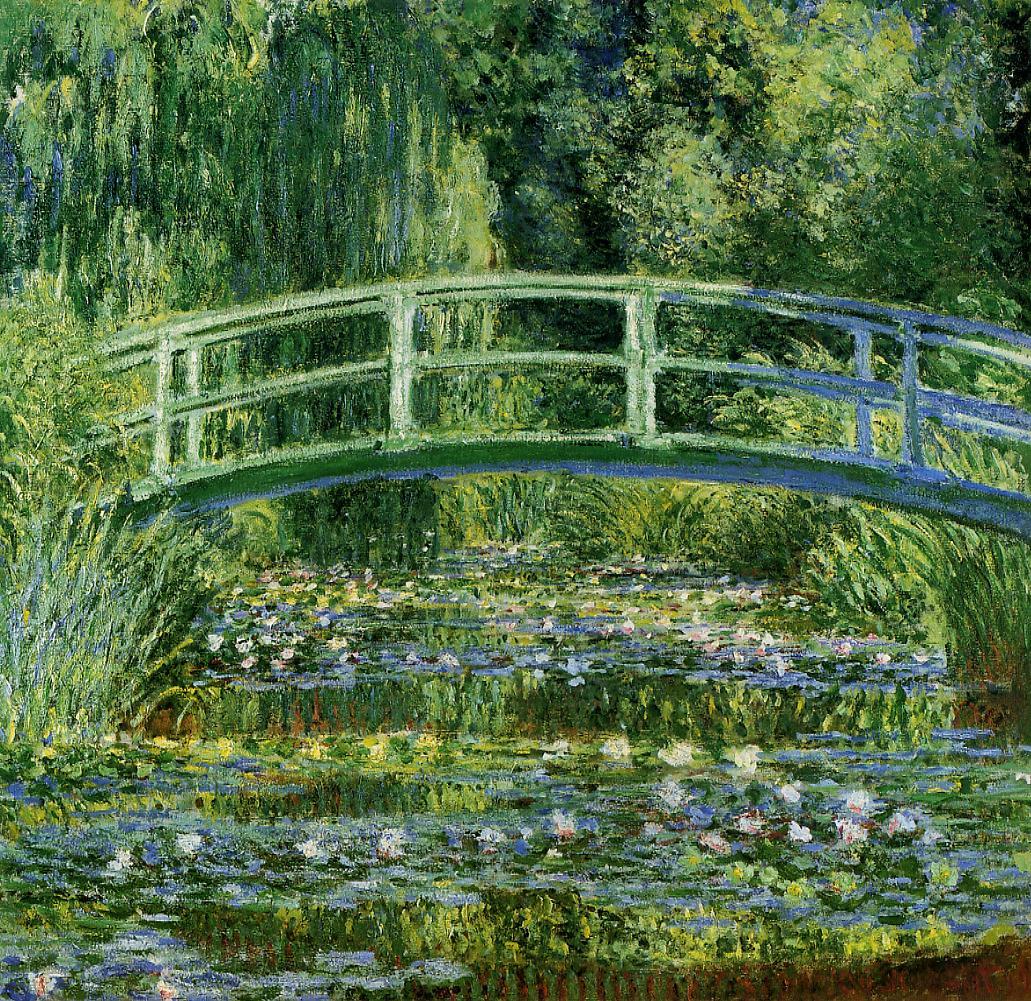


1. **The above is an image of a painting by which artist?**
   1. **Claude Monet**
   2. **Eduard Manet**


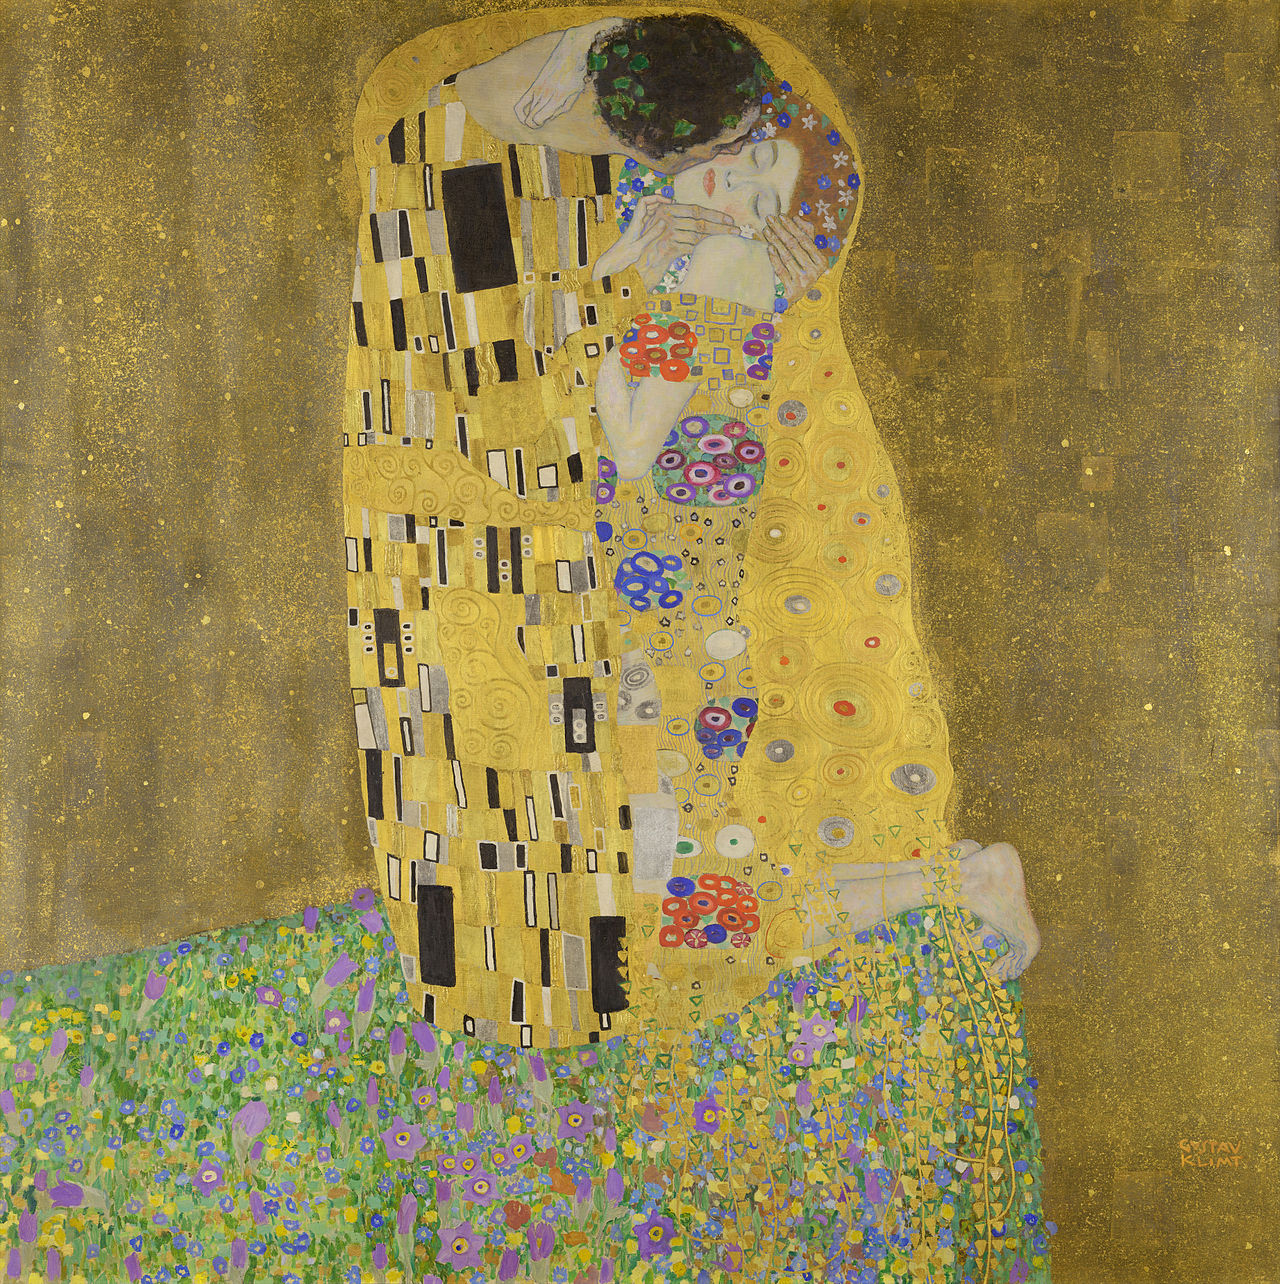


1. **The above is an image of a painting by which artist?**
   1. **Rudolf Hausner**
   2. **Gustav Klimt**

**
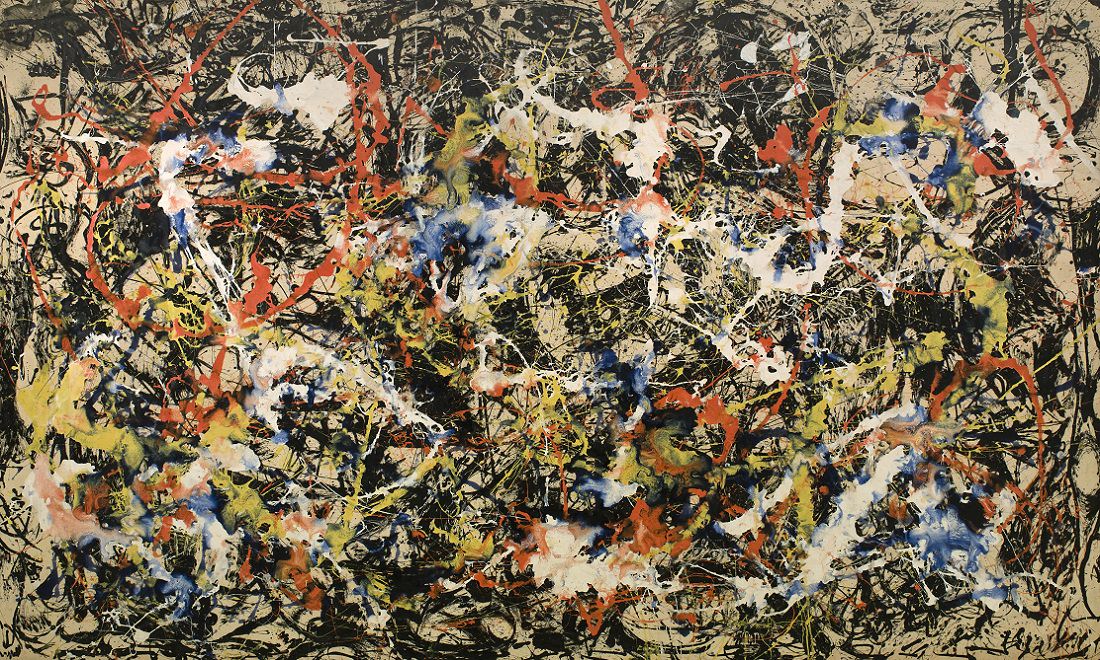
**

1. **The above is an image of a painting by which artist?**
   1. **Jackson Pollock**
   2. **Franz Kline**

**
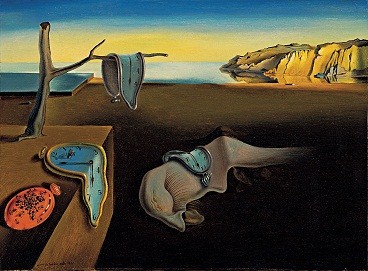
**

1. **The above is an image of a painting by which artist?**
   1. **Marcel Duchamp**
   2. **Salvador DalÌ**

**
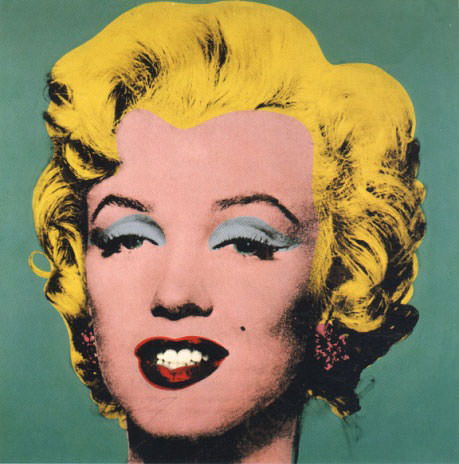
**

1. **The above image is associated with which artist?**
   1. **Roy Lichtenstein**
   2. **Andy Warhol**

**GEOGRAPHY QUIZ**

1. **Oklahoma state shares a border with:**
   1. **New Mexico**
   2. **Arizona**
2. **Tokyo is closer to:**
   1. **Hamamatsu**
   2. **Kyoto**
3. **The capital of the Philippines is:**
   1. **Davao**
   2. **Manila**
4. **Melbourne is in:**
   1. **Australia**
   2. **New Zealand**
5. **Which city is closer to Rome?**
   1. **Naples**
   2. **Florence**

**
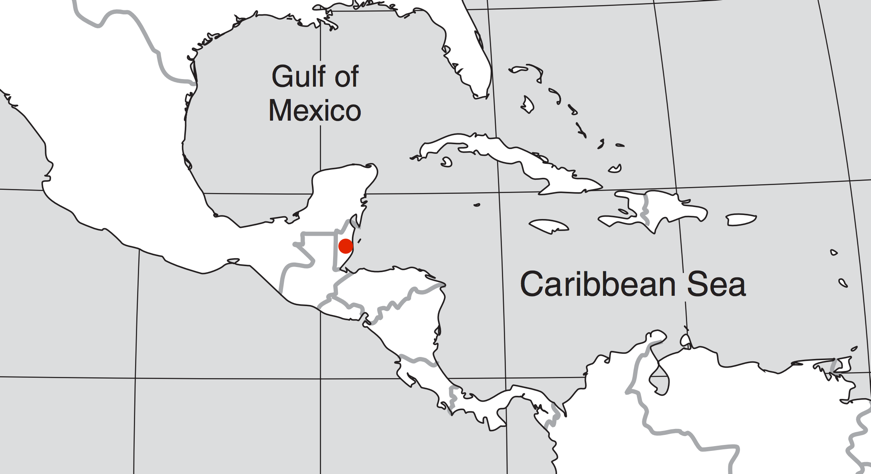
**

1. **In which country is the red dot located in? (Above)**
   1. **Belize**
   2. **Guatemala**

**
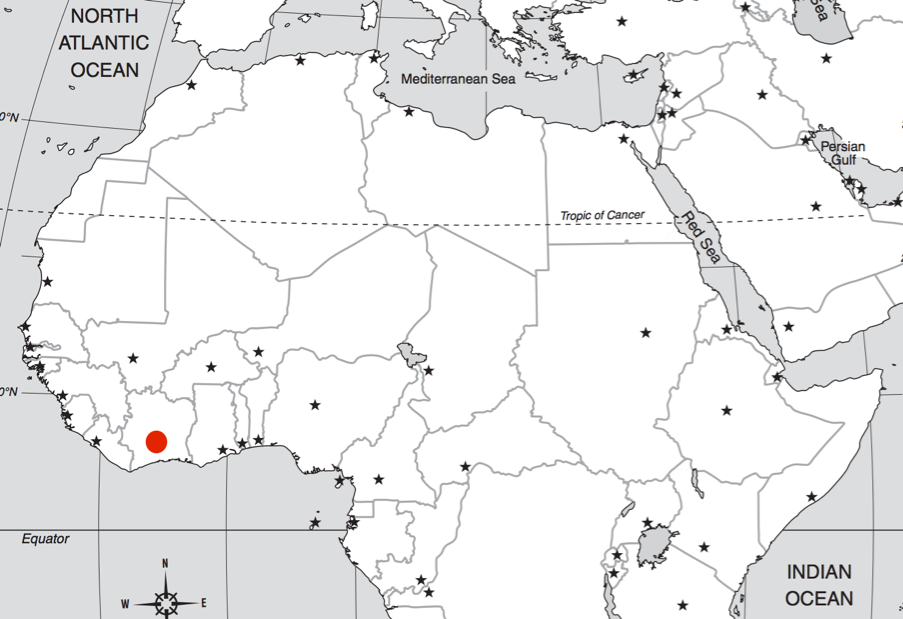
**

1. **In which country is the red dot located in? (Above)**
   1. **The Ivory Coast**
   2. **Nigeria**

**
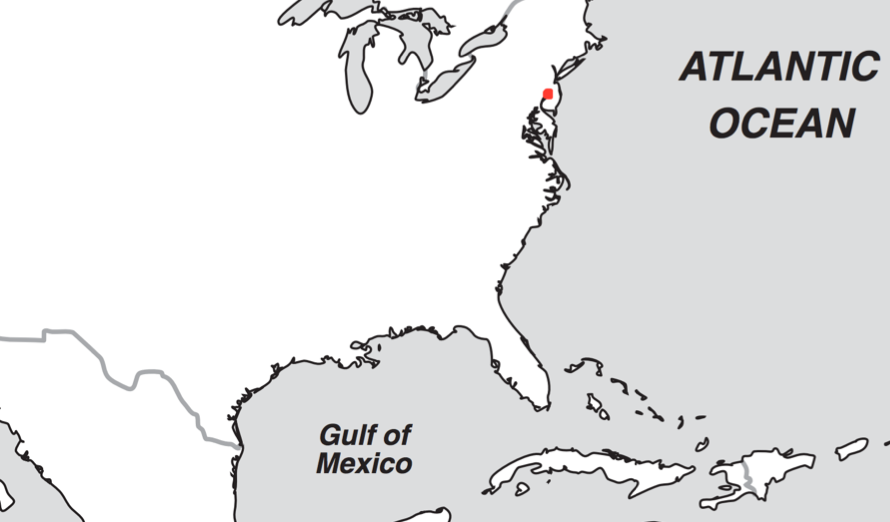
**

1. **In which city is the red dot located? (Above)**
   1. **Seattle**
   2. **Philadelphia**

**
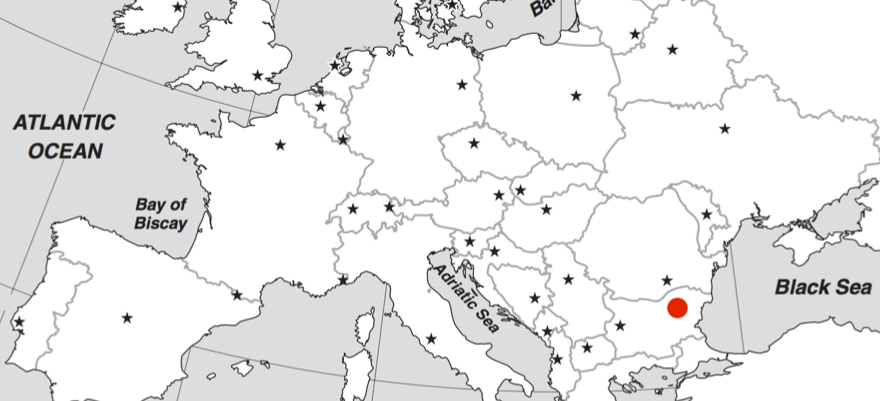
**

1. **In which country is the red dot located? (Above)**
   1. **Bulgaria**
   2. **Greece**

**
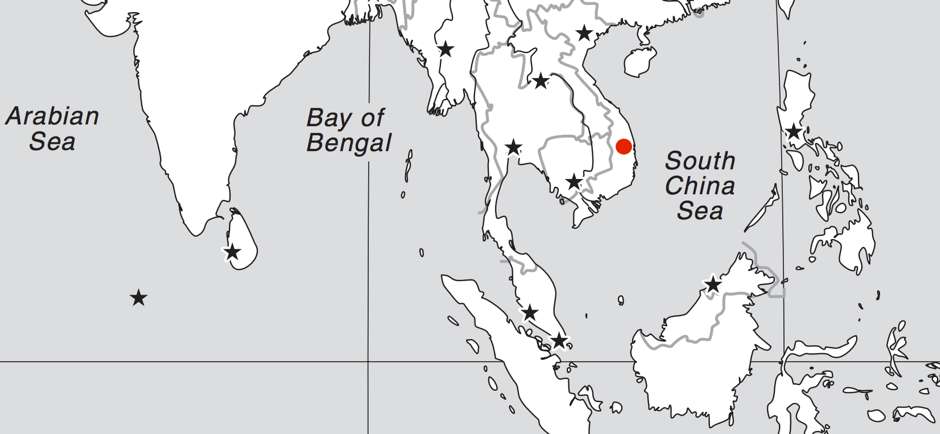
**

1. **In which country is the red dot located? (Above)**
   1. **Vietnam**
   2. **Laos**

**LANGUAGE IDENTIFICATION**

1. ***‘Gobierno’* means ‘government’ in which language?**
   1. **Spanish**
   2. **Portuguese**
2. ***‘Vinaka’* means ‘Thank you’ in:**
   1. **Fijian**
   2. **Swedish**
3. ***‘Umut’* is ‘hope’ in:**
   1. **German**
   2. **Turkish**
4. ***‘Pudel’* means ‘bottle’ in:**
   1. **Bulgarian**
   2. **Estonian**
5. ***‘Bloem’* means ‘flower’ in:**
   1. **Dutch**
   2. **Danish**

**
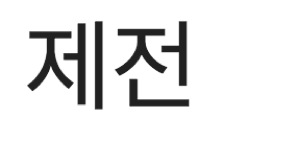
**

1. **The above means 'festival' written in which language?**
2. **Japanese**
3. **Korean**

**
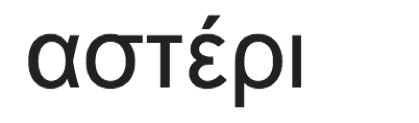
**

1. **The above means ‘star’ written in which language?**
   1. **Macedonian**
   2. **Greek**

**
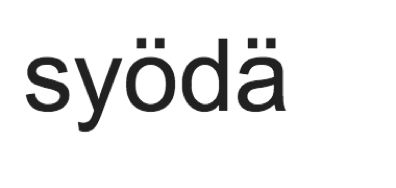
**

1. **The above means ‘to eat’ written in which language?**
   1. **Finnish**
   2. **Swedish**

**
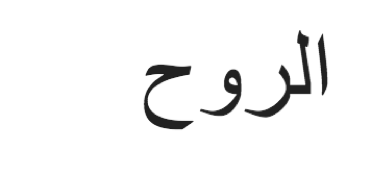
**

1. **The above means ‘soul’ written in which language?**
   1. **Arabic**
   2. **Armenian**

**
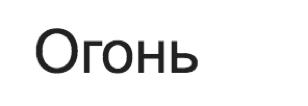
**

1. **The above means ‘fire’ written in which language?**
   1. **Russian**
   2. **Bulgarian**

**WEIGHT ESTIMATION**

1. **A tennis ball weighs:**
   1. **58.5g**
   2. **5.85g**
2. **What does a typical (class 1A) fire extinguisher weigh?**
   1. **115kg**
   2. **1.15kg**
3. **Which weighs more, on average?**
   1. **Apricot**
   2. **Avocado**
4. **Which weighs more, on average?**
   1. **An ostrich egg**
   2. **A hen’s egg**
5. **What does an average baking potato weigh?**
   1. **18 g**
   2. **180g**

**
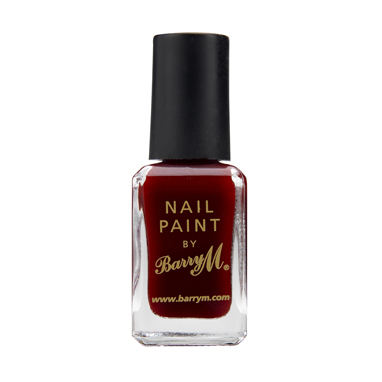
**

1. **An average pot of nail varnish weighs:**
   1. **62g b. 162 g**

**
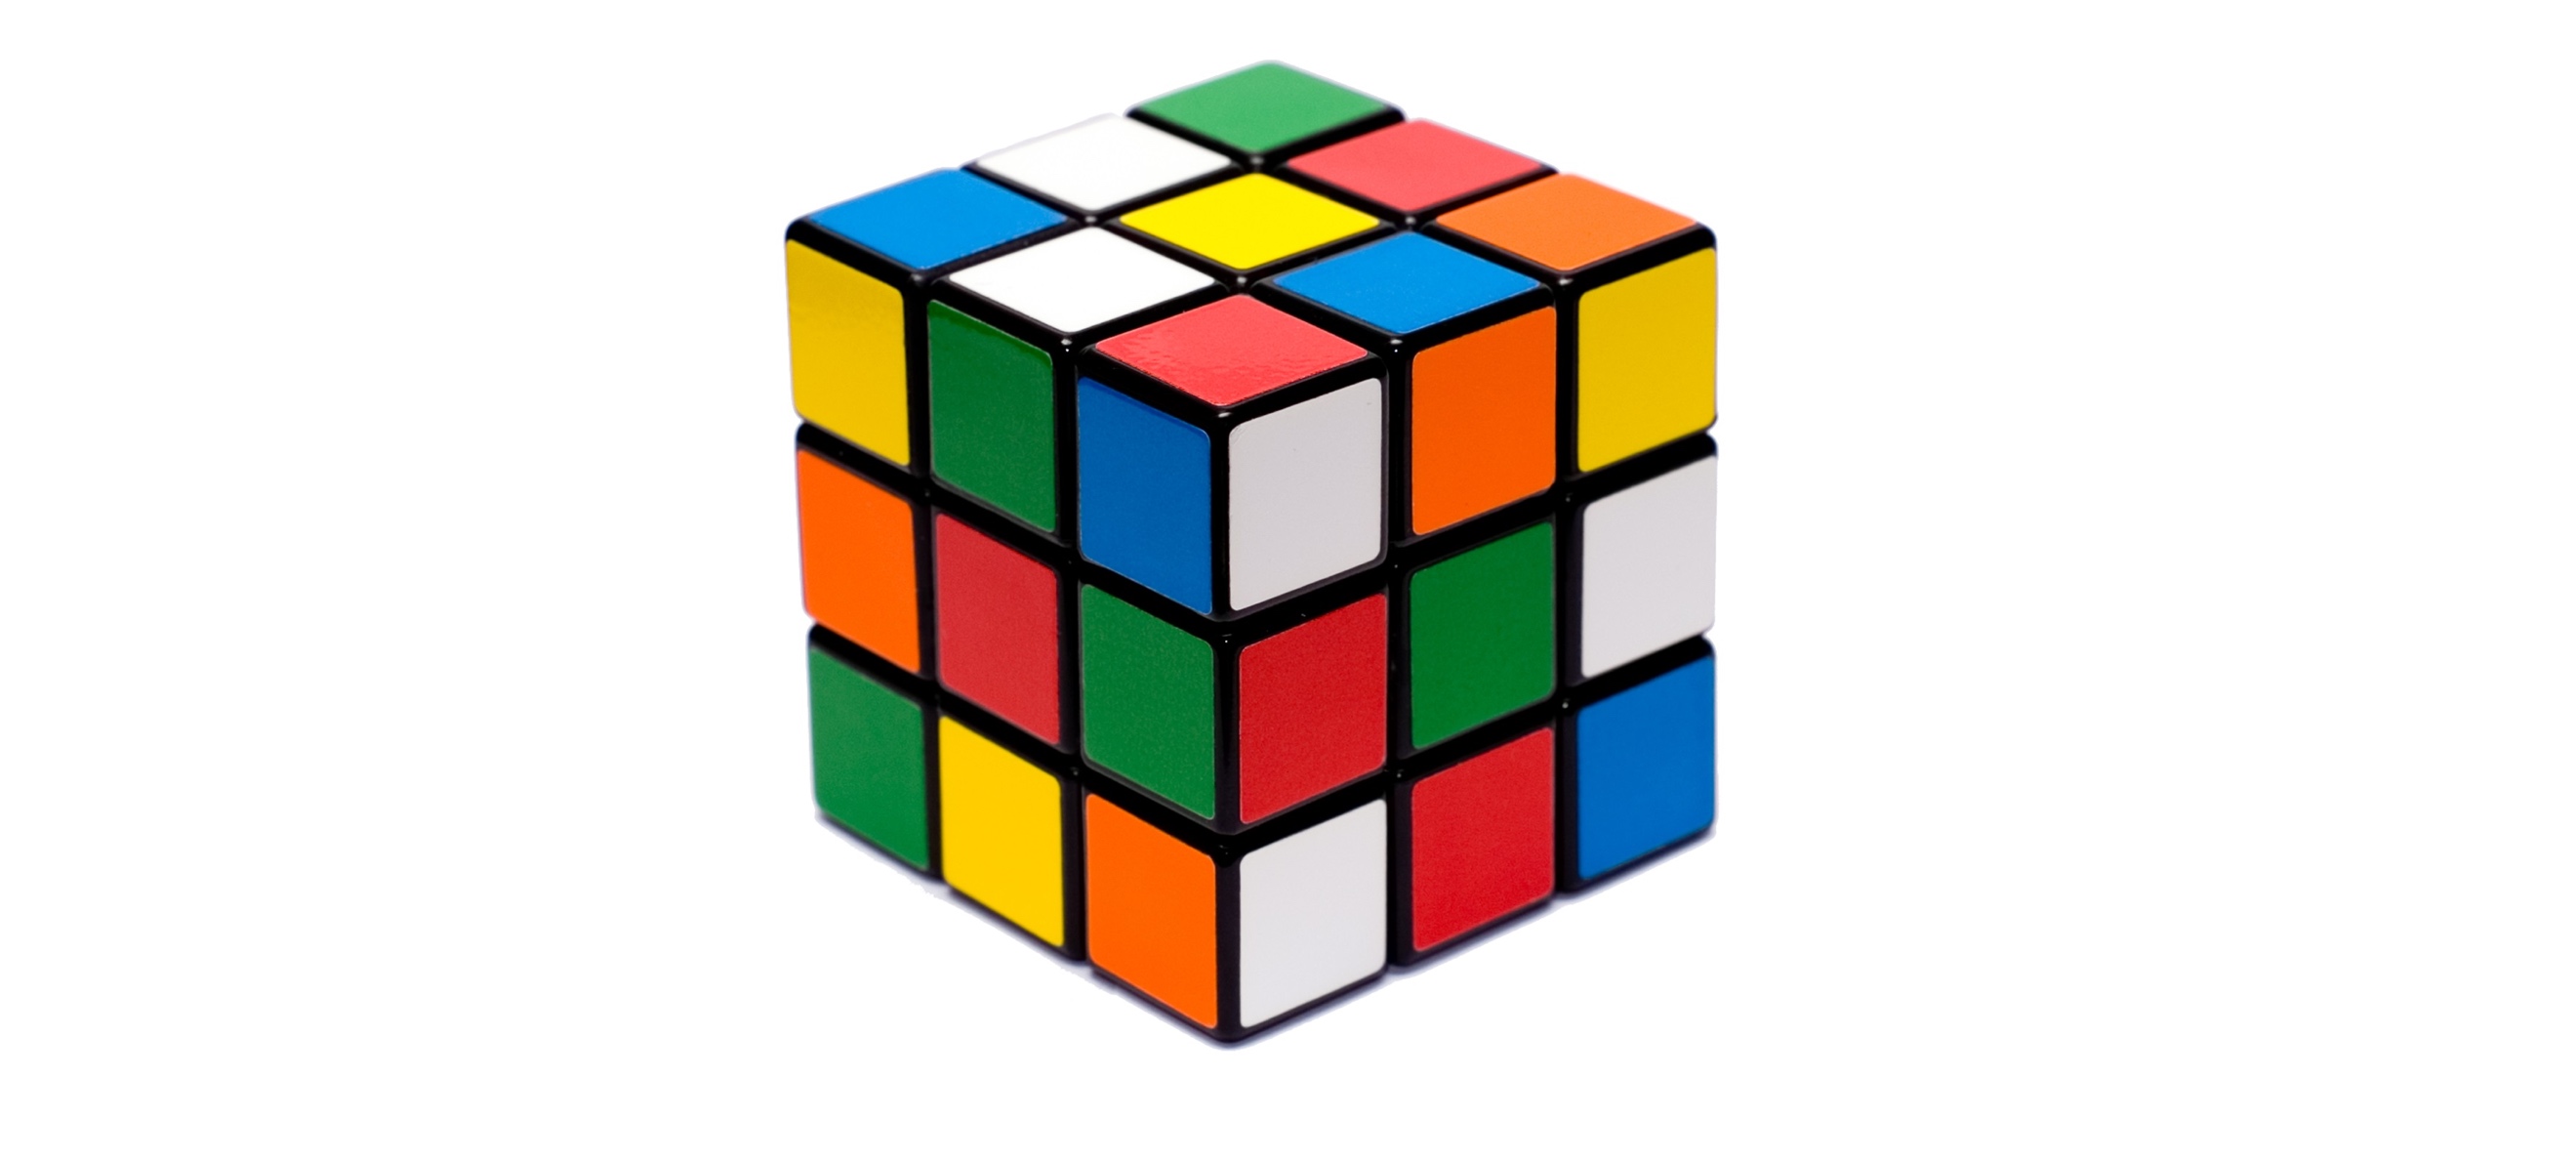
**

1. **A Rubik’s cube weighs:**
   1. **0.14kg b. 1.14kg**

**
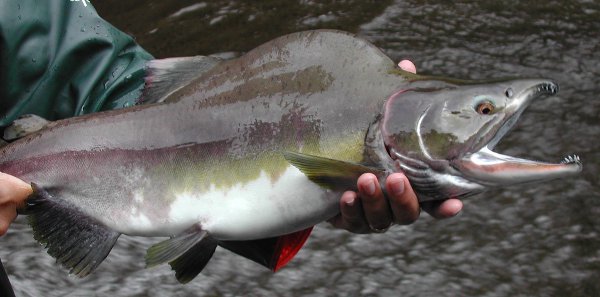
**

1. **An average Pink Salmon weighs:**
   1. **1.7kg b. 17kg**

**
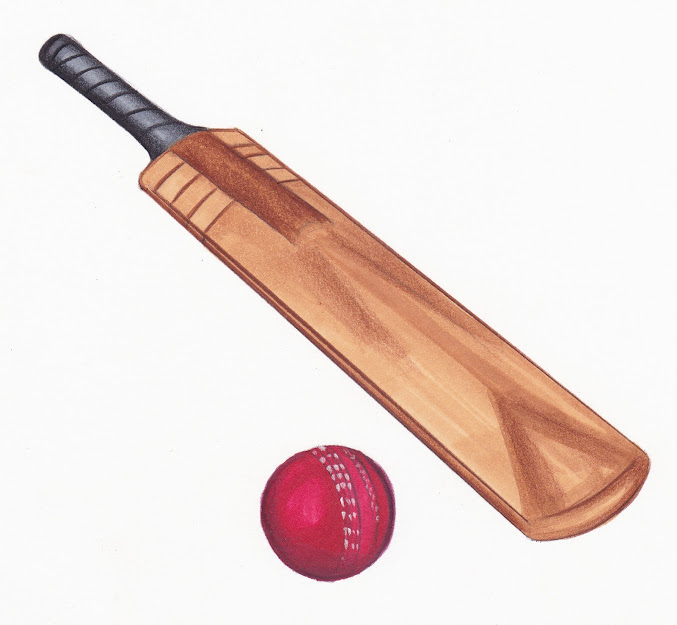
**

1. **A cricket bat weighs:**
   1. **1.4 kg**
   2. **14 kg**

**
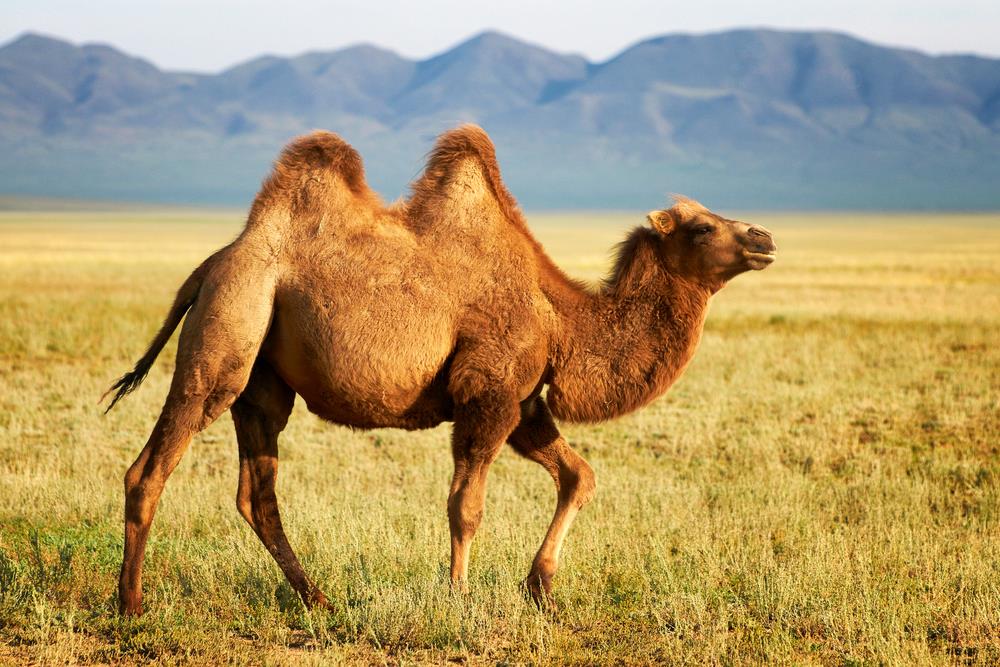
**

1. **The average weight of a camel is:**
   1. **480kg**
   2. **48kg**

**Estimated score (out of 40): __________**

**YOUR ID NUMBER: __________ THEIR ID NUMBER: ___________**

Please rate this person according to the following scale:

**1------------2------------3------------4------------5------------6------------7**

**Not At All/ NOT TRUE**

**Somewhat**

**Very Much/ TRUE**

1. Members of your group respect and admire them _____
2. Members of your group do NOT want to be like them_____
3. They enjoy having control over other members of the group_____
4. Members of your group always expect them to be successful_____
5. They often try to get their own way regardless of what others in the group may want_____
6. Members of your group do NOT value their opinion_____
7. They are willing to use aggressive tactics to get their way_____
8. They are held in high esteem by members of the group_____
9. They try to control others rather than permit others to control them_____
10. They do NOT have a forceful or dominant personality_____
11. Members of the group know it is better to let them have their way_____
12. They do NOT enjoy having authority over other members of the group_____
13. Their unique talents and abilities are recognized by others in the group_____
14. They are considered an expert on some matters by members of the group_____
15. Members of your group seek their advice on a variety of matters_____
16. Members of your group are afraid of them_____
17. Others do NOT want to spend time with them_____

**During the group quiz discussion, this person:**

1. Had high status_____
2. Led the task_____
3. Was paid attention_____

**Overall:**

1. I like this person _____ 22. I like working with this person________

| | **Group no.** | Group_Affiliation | **Date of participation** | | --- | --- | --- | | *1* | PILOT TEST (Office) --**DELETED** | 22/05/2017 | | 2 | Newquay Zoo Staff | 20/07/2017 | | 3 | FXPlus Library Staff | 15/08/2017 | | 4 | Falmouth Cruiseship Ambassadors_4 | 15/08/2017 | | 5 | Falmouth Cruiseship Ambassadors_5 | 15/08/2017 | | 6 | REDWING Community Centre | 11/10/2017 | | 7 | REDWING_2 | 11/10/2017 | | 8 | SourceFM Presenters | 22/10/2017 | | 9 | Nankersey Male Choir | 07/11/2017 | | 10 | Active Plus_Hayle | 04/12/2017 | | 11 | Active Plus_2 -**DELETED FOR WITHIN-GROUP** | 04/12/2017 | | 12 | Flushing & Mylor Gig Rowing | 06/12/2017 | | 13 | SSE_Truro Health&Wellbeing Innovation Centre | 15/01/2018 | | 14 | ActivePlus_St Ives | 16/01/2018 | | 15 | Active Plus_Clies | 17/01/2018 | | 16 | Psych-Soc_Streatham | 30/01/2018 | | 17 | Psych-Soc_Streatham2 | 30/01/2018 | | 18 | Dyslexia Cornwall_Truro Innovation Centre | 31/01/2018 | | 19 | Bio-Soc Streatham_3 | 08/02/2018 | | 20 | Streatham Students_4 | 08/02/2018 | | 21 | Clarinet Choir | 08/02/2018 | | 22 | Hotel Perfect_Tremough Innovation Centre | 09/02/2018 | | 23 | Falmouth Kayak Club_students | 13/02/2018 | | 24 | Roaming CIC _Penzance | 15/02/2018 | | 25 | Penryn MSc students | 26/02/2018 | | 26 | Mylor Mums | 04/03/2018 | | 27 | Philosopher's Hat | 05/03/2018 | | 28 | Calstock Chess Club | 06/03/2018 | | 29 | Falmouth Fish Sea Shanty Collective | 07/03/2018 | | 30 | Pirates of Penryn boardgame creators | 07/03/2018 | | 31 | Cambourne Chess Club | 12/03/2018 | | 32 | Penryn MSc students_2 | 15/03/2018 | |
| --- | --- | --- | --- | --- | --- | --- | --- | --- | --- | --- | --- | --- | --- | --- | --- | --- | --- | --- | --- | --- | --- | --- | --- | --- | --- | --- | --- | --- | --- | --- | --- | --- | --- | --- | --- | --- | --- | --- | --- | --- | --- | --- | --- | --- | --- | --- | --- | --- | --- | --- | --- | --- | --- | --- | --- | --- | --- | --- | --- | --- | --- | --- | --- | --- | --- | --- | --- | --- | --- | --- | --- | --- | --- | --- | --- | --- | --- | --- | --- | --- | --- | --- | --- | --- | --- | --- | --- | --- | --- | --- | --- | --- | --- | --- | --- | --- | --- | --- | --- |
|  |

| | name | position | | --- | --- | | A**** ***** | Mother | | Andrew | Councillor | | Andrew **** | Councillor | | Andrew ***** | Broadcaster | | ***** ***** | VC of Falmouth Uni | | Arthur **** | Union leader | | B. Portman | X Mayor | | Ben Bradshaw | MP | | B** ***** | Head Teacher | | Beppe Grillo | Politician | | Beyonce | Singer | | Bob |  | | Bob Devereux | Poet, Playwrite | | Boris Johnson | Foreign Secretary | | Boris Johnson | Foreign Secretary | | Boris Johnson | Foreign Secretary | | Boris Johnson | Foreign Sec | | Boris Johnson | F. minister | | Boris Johnson | Foreign Minister | | Brad Brown | Creator of "more to life" programme | | Brother Roger | Late Friar of Taize | | Captain Holt | Captain of Police (Brooklyn 99) | | Carl Sagan | SETI, attack on superstition, novel Contact | | Caroline Lucas | Leader Green Party | | Christopher ***** | Director of******, Cathedral | | Christopher ***** | Lead story developer | | Colin ****** | Neighbour | | Cornelius Oliver | Councillor | | Cyndi Lauper | Singer/ human rights activist | | David Attenborough | Broadcaster | | David Attenborough | Broadcaster | | David Attenborough | Tv presenter | | David Attenborough | Conservationist/presenter | | David Attenborough | BBC Presenter | | David Attenborough | tv presenter/environmentalist/wildlife activist | | David Attenborough | Presenter | | David Attenborough | Presenter/ecologist | | David Attenborough | Naturalist | | David Attenborough | Tv presenter | | Deborah Francis-White | Leads the Guilty Feminist Podcast | | Dennis Skinner | MP For Bolsever | | Donald Trump | Prime Minister | | Dr Nigel Hewitt | Director of a Charity | | Dr Peter Rodgers | GP/chairman of tennis club | | Eddie Calvo | Govenor of Guam | | Eddie Home | Football Club Manager | | Edward Davey | MP | | Enoch Powell | Politician | | Frank Whittal | Inventor | | Friedensreich Hundertwasser | Artist | | George Eustace | MP | | George Orwell | Author | | Ghandi | leader | | Grayson Perry | Artist/potter | | Grenville Chapple | Mayor | | Henry Bew | Head of English Department | | Jamie Shiner | Business Leader | | Jane Goodall | Primatologist | | Jenny | Artist/musician | | Jeremy Corbyn | Leader of opposition | | Jeremy Corbyn | Politician | | Jeremy Corbyn | Labour Party Leader | | Jeremy Corbyn | Leader Labour Party | | Jeremy Corbyn | Labour Party Leader | | Jeremy Corbyn | Leader of the labour party | | Jeremy Corbyn | Labour Leader | | Jeremy Corbyn | labour Party Leader | | Jeremy Corbyn | Labour Party Leader | | Jeremy Corbyn | Leader of the opposition | | Jeremy Corbyn | Leader of the labour party | | Jeremy Corbyn | Leader of opposition | | Jeremy Hunt | Health Cabinet | | JK Rowling | Author | | Jo Feather | Taught sailing after the war, got MBE | | John Goodman | Newquay Facebook Community Admin | | John Pollard | Councillor | | Johnny Depp | Celebrity | | Lesley | manageress of Hayle community centre | | L***** ****** | Day care centre manager | | Linda | Mayor | | Mancelo Rebelo Sousa | Republic President | | Marconi For Radio | Early Communications | | Margaret Thatcher | Prime Minister | | Mark Ashton | Activist | | Mary Berry | Cook | | Mary Holborough | High Sherrif | | Michael Gove | M.P. | | Michael Tyade | Musician | | M***** ******* | Step Father | | Mrs May | Prime Minister | | Mrs Sanderson | Headmistress of local school | | Mrs x | Headteacher of primary school | | na | na | | Nicholas ******* | Leader of local group | | Nicolae Ceausescu | President (Former) | | Oscar Wilde | author/activist/dandy | | Ozzy Osbourne | Rock Star Supreme | | Patrick Gale | Author | | Paul | International project director | | Penny HC Dinh | Youtuber | | Peter L Mere | Peace Campaigner CND | | Phil ***** | Traveller&Gypsy Liason Officer | | Prince Charles | Duke of Cornwall | | Prince William | Heir to the Throne | | The Queen | Head of State | | The Queen | Queen | | Richard Charter | ex Bishop of London | | ****** ****** | Chess club secretary + local accountant | | Richard ****** | free software advocate & software developer | | Rick Stein | Celeb Chef | | R********** | President of ****** Association | | Rodrigo Duterte | President of Phillipines | | Roselyn | Director | | Rupaul Charles | Drag Queen | | Sam Mezec | States of Jersey Reform Party Member | | Sarah Newton | MP Falmouth | | Sarah Newton | M.P. | | Sarah Newton | Tory MP Truro & Falmouth | | Sarah Porter | Councilor | | Shanne Sands | Poet | | ******** | Head drama teacher sixth form | | Sheryll Murray | Local MP | | Shinzo Abe | Prime minister of Japan | | Sir Humphry Davy | Statue | | Steve ***** | Advocacy Support Worker | | Tarja Halona | former president of Finland | | Theresa May | The Prime Minister | | The Queen | Queen of England | | The Queen | Monarch | | Theresa May | Prime Minister | | Theresa May | Prime Minister | | Theresa May | PM | | Theresa May | Prime Minister | | Theresa May | Prime minister | | Theresa May | Prime Minister | | Theresa May | Prime Minister | | Theresa May | Prime minister | | Theresa May | Prime Minister | | Theresa May | Prime Minister | | Theresa May | Prime Minister | | Theresa May | Prime Minister | | Theresa May | Prime Minister | | Theresa May | Prime Minister | | Theresa May | Prime Minister | | theresa May | Prime minister | | Theresa May | Prime Minister | | Theresa May | Prime Minister | | Theresa May | Prime Minister | | Theresa May | Prime Minister | | Tony Blair | past PM | | Traian Bruma | Head of alternative university in Romania | | Vicky M | Green politician | | Winston Churchill | Wartime PM | | Winston Churchill | Prime Minister | | Winston Churchill | ex Prime minister | |
| --- | --- | --- | --- | --- | --- | --- | --- | --- | --- | --- | --- | --- | --- | --- | --- | --- | --- | --- | --- | --- | --- | --- | --- | --- | --- | --- | --- | --- | --- | --- | --- | --- | --- | --- | --- | --- | --- | --- | --- | --- | --- | --- | --- | --- | --- | --- | --- | --- | --- | --- | --- | --- | --- | --- | --- | --- | --- | --- | --- | --- | --- | --- | --- | --- | --- | --- | --- | --- | --- | --- | --- | --- | --- | --- | --- | --- | --- | --- | --- | --- | --- | --- | --- | --- | --- | --- | --- | --- | --- | --- | --- | --- | --- | --- | --- | --- | --- | --- | --- | --- | --- | --- | --- | --- | --- | --- | --- | --- | --- | --- | --- | --- | --- | --- | --- | --- | --- | --- | --- | --- | --- | --- | --- | --- | --- | --- | --- | --- | --- | --- | --- | --- | --- | --- | --- | --- | --- | --- | --- | --- | --- | --- | --- | --- | --- | --- | --- | --- | --- | --- | --- | --- | --- | --- | --- | --- | --- | --- | --- | --- | --- | --- | --- | --- | --- | --- | --- | --- | --- | --- | --- | --- | --- | --- | --- | --- | --- | --- | --- | --- | --- | --- | --- | --- | --- | --- | --- | --- | --- | --- | --- | --- | --- | --- | --- | --- | --- | --- | --- | --- | --- | --- | --- | --- | --- | --- | --- | --- | --- | --- | --- | --- | --- | --- | --- | --- | --- | --- | --- | --- | --- | --- | --- | --- | --- | --- | --- | --- | --- | --- | --- | --- | --- | --- | --- | --- | --- | --- | --- | --- | --- | --- | --- | --- | --- | --- | --- | --- | --- | --- | --- | --- | --- | --- | --- | --- | --- | --- | --- | --- | --- | --- | --- | --- | --- | --- | --- | --- | --- | --- | --- | --- | --- | --- | --- | --- | --- | --- | --- | --- | --- | --- | --- | --- | --- | --- | --- | --- | --- | --- | --- | --- | --- | --- | --- | --- | --- | --- | --- | --- | --- | --- | --- | --- | --- | --- | --- | --- | --- | --- | --- | --- |
|  |

| | **name** | **want to learn:** | | --- | --- | | Alex Pritchard | Politics | | Alf Coles | Devloping conviction in others | | Alice | social skills | | Alistair | Maths education | | Amanda Brown | Yoga Skills | | Andrew George | Clear public speaking and articulation | | Andrew Mitchell | Council affairs | | Andrew Mitchell | Council affairs | | Andrew Nancharrow | Wooden Boat Building | | Andrew Tozer | Artist | | Annabelle Waite | Singing/performance | | Augustine | Rhetoric | | B. Portman | ability to sort thngs out | | Ben Mayer | na | | Bethany Saunders | See life like she does | | Bobby Moore | Football Skills | | Boris Johnson | Expand on knowledge of German | | Boris Johnson | Foreign Sec. | | Brian Cox | Scientific Knowledge | | Brian Goldthorp | Knowledge | | Bryony Oncuul | Their knowledge of colonisation and heritage | | Carl Hester | Dressage coaching | | Caroline Harris/boss | eventing/riding | | Caroline Lucas | Eloquence | | Che Willbraham | Digital Story making | | Chris D | Patience/teaching skills | | Chris Rubbery | Advance Sailing Safety | | Churchill | Public Speaking | | Claire Hall | sewing skills | | Claire Ingleheart | Personality&Music | | Cliff Thomas | His philosophy on life | | College professor | communication skills | | Dalai Lama | Wisdom | | Dali Lama | Tolerance | | Dan | To play music/sing well | | Darryl Thorpe | Seal Rescue | | David Attenborough | Animal knowledge | | David Attenborough | to inspire and motivate | | David Bowie | Knowledge | | DAVID COLEMAN | DEMOGRAPHY | | Dawn French | Comedy | | Delia Smith | Cooking | | Derek Guthrie | Knowledge of art | | Doctor | Patience | | Dr Drummond | be like him | | Dr. Phil Hammond | Presentaiton & speaking skills | | Eddy Jones | na | | Elaine Taneye | Musical understanding & technique | | Emilia Clarke | Confidence | | Emma Watson | Influential Speaking on feminist issues | | Eniola Aluko | Football | | Eric Meijaard | Productivity, influence | | Fiona Richardson | Positivity & Passion | | Frank Auerbach | Painting | | Fuzz Townsend | Mechanical Knowledge/car restoration | | Gary | Be awesome | | Gary Ward (senior bird keeper) | knowledge of bird husbandry | | Giorgio Fraticelli | outgoing/ networking skills | | Grayson Perry | artistic confidence | | Hannah | choreography | | Head horse worker, Bosence Farm | Equine Therapy | | Helen Mirren | to be confident & forthright | | Helen Porter | Musical performance | | J. K. Rowling | Success | | J.K. Rowling | writing skills | | James Scourse | ability to understand and use knowledge | | Jamie Oliver | How to cook | | Jane Sand | How to paint | | Jard Acton | Pleasant Nature Outdoor Sessional Skills | | Jennifer Morrison | Acting Skills | | Jeremy Corbyn | Conviction | | Jeremy Paxman | General Knowledge | | JK Rowling | writing | | JK Rowling | Writing | | John | Zen Buddhism | | John Gordon | Poet | | John Gordons | Guitar Teacher | | John Williams | Guitar Skills | | Johnny Cowling | Ability to make people laugh | | Julia Nott | Play piano better | | Kerstin Skining | organisation | | Kim Conchie(Cornwall Chamber of Commerce) | Management & Presentation Skills | | Lawrence John | Tailoring | | Lecturer X | Enthusiasm & public speaking | | Les |  | | Lesley Chenels | Fairness | | Leslie Bradley Peers | Standing my ground, networking, communicating | | Lisa Wisdom | Artistic forwardness/success | | M Bryant | Outlook on life | | Madhar Jaffrey | Recipes, Cooking, techniques and skills | | Margaret Attwood | Writing | | Marianne De Trey | Living a potter's life | | Mary | Only see the best in people | | Mary Chan | their profession | | Matthew Mercer | Creativity | | Matthew Rogers | To relax | | Matthew Rogers | Management skills | | Max Shepherd | most things | | Melanie Wheeler | be more like them | | Mestre zo Antonio | Caspiera | | Michael Smith | Diplomacy | | Mike Parknoy | Drumming & Music | | Mom | Perseverance, energetic personality, wanting to step out of comfort zone | | Mother | patience/compassion | | Mr Harvey | Biology | | Mum | kindness, patience, understanding | | Music band | strength of will | | My Mother | loyalty, resiliance | | na | na | | na | na | | Nicholas Smith | How to lead others | | Nicole Crane | Quilting | | Nik Elvy | How to lead/teach/manage youth group | | Niki Pearce | Socialising Skills | | no.127 | excellent parenting skills | | Olivia A | Dance | | Oscar Wilde | confidence/writing skills | | Pat Parelli | Horsemanship | | Paul Smith | Motivation | | Peter Jones | Business acumen | | Phil | Carpentry/ ship building | | Prince William | Modern way of thinking | | Puzzle | Painting Landscapes | | Queen Elizabeth | na | | Queen Elizabeth II | her patience | | Richard Baker | Book keeping skills | | Richard Branson | Business acumen | | Richard Osmond | General Knowledge | | Robert Fischer | Chess Genius | | Roisin Perry | Dedication | | Ros Williams | Printmaking | | Roselyne | Management | | Roxana Marin | enthusiasm & energy | | S. Thompson | Patience | | Sean | Paddleboarding weSUP Gylly Beach | | Shakleton | Adventurous spirit/exploration | | Shane Glachin | Academic | | Shannon McManus | music | | Shirley Williams | Leadership/negotiation | | Simon Clark | Video editing skills | | Simon Parry | Knowledge | | Stan Lee | Drawing Style | | Stephen Hawking | Cosmology | | Suvi Pattibagar | Discipline & organisational skills | | Suzanne Cotter | Knowledge | | Terry McClintock | Indian Cooking | | The PM | general skills | | Tim Brabants | commitment to training | | Tim Shaw | Sculptor | | Tom Rice | His knowledge of anthropology | | Tony Blair | Self-confidence | | Wilfred Owen | Skills with words | | Will Smith | Ambition | | William F Sanday | Music, oragn & piano | | Yo yo ma | technique | |  |
| --- | --- | --- | --- | --- | --- | --- | --- | --- | --- | --- | --- | --- | --- | --- | --- | --- | --- | --- | --- | --- | --- | --- | --- | --- | --- | --- | --- | --- | --- | --- | --- | --- | --- | --- | --- | --- | --- | --- | --- | --- | --- | --- | --- | --- | --- | --- | --- | --- | --- | --- | --- | --- | --- | --- | --- | --- | --- | --- | --- | --- | --- | --- | --- | --- | --- | --- | --- | --- | --- | --- | --- | --- | --- | --- | --- | --- | --- | --- | --- | --- | --- | --- | --- | --- | --- | --- | --- | --- | --- | --- | --- | --- | --- | --- | --- | --- | --- | --- | --- | --- | --- | --- | --- | --- | --- | --- | --- | --- | --- | --- | --- | --- | --- | --- | --- | --- | --- | --- | --- | --- | --- | --- | --- | --- | --- | --- | --- | --- | --- | --- | --- | --- | --- | --- | --- | --- | --- | --- | --- | --- | --- | --- | --- | --- | --- | --- | --- | --- | --- | --- | --- | --- | --- | --- | --- | --- | --- | --- | --- | --- | --- | --- | --- | --- | --- | --- | --- | --- | --- | --- | --- | --- | --- | --- | --- | --- | --- | --- | --- | --- | --- | --- | --- | --- | --- | --- | --- | --- | --- | --- | --- | --- | --- | --- | --- | --- | --- | --- | --- | --- | --- | --- | --- | --- | --- | --- | --- | --- | --- | --- | --- | --- | --- | --- | --- | --- | --- | --- | --- | --- | --- | --- | --- | --- | --- | --- | --- | --- | --- | --- | --- | --- | --- | --- | --- | --- | --- | --- | --- | --- | --- | --- | --- | --- | --- | --- | --- | --- | --- | --- | --- | --- | --- | --- | --- | --- | --- | --- | --- | --- | --- | --- | --- | --- | --- | --- | --- | --- | --- | --- | --- | --- | --- | --- | --- | --- | --- | --- | --- | --- | --- | --- | --- | --- | --- | --- | --- | --- | --- | --- | --- | --- | --- | --- | --- | --- | --- | --- | --- | --- | --- | --- | --- | --- | --- | --- | --- | --- | --- | --- | --- | --- | --- |
|  |  |
|  |  |
